# Supplementary figures and images for: A Bioinformatics Evaluation of the Role of Dual-Specificity Tyrosine-Regulated Kinases in Colorectal Cancer
Source: MDPI journal article supplement (doi:10.3390/cancers14082034), 2022-04-18

**Figure S1**

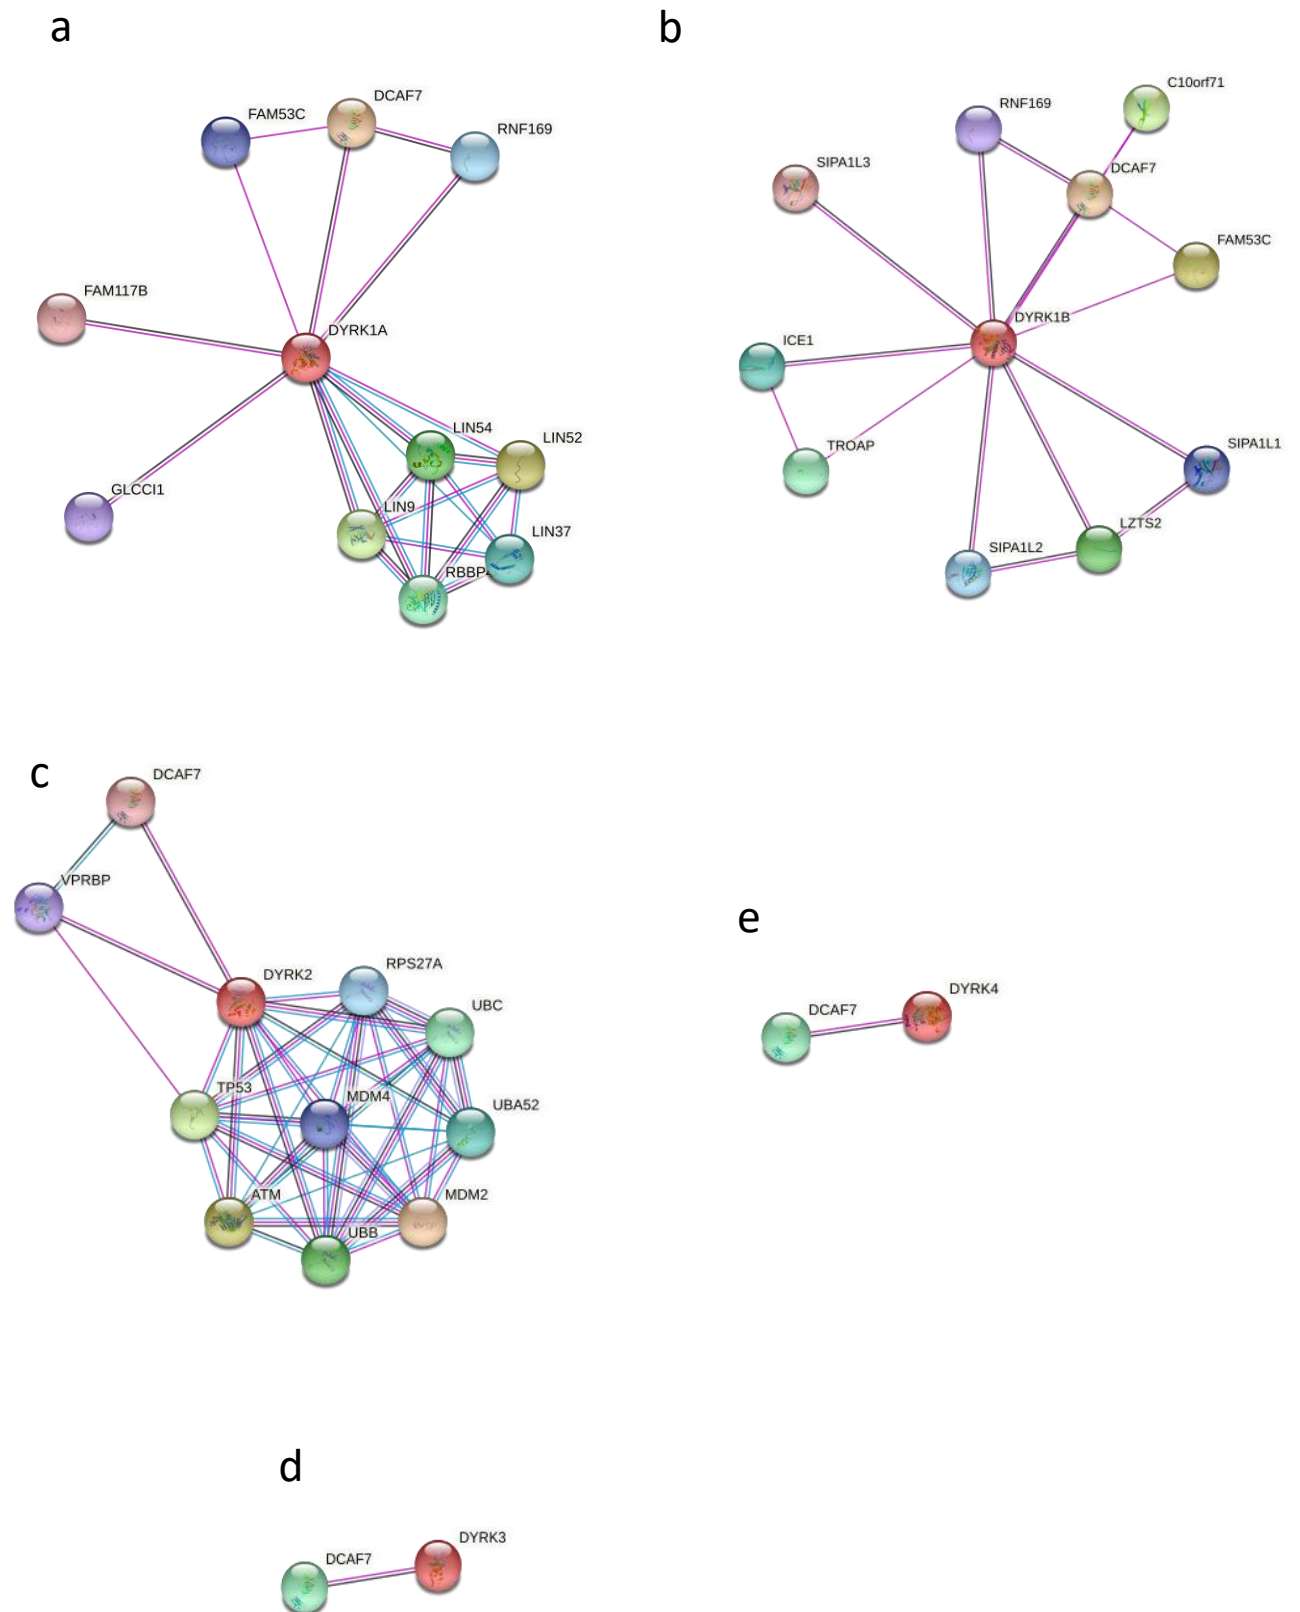

**Figure S1:** Functional protein association network predicted from STRING.

Supplement: s1 [file s1]
